# Supplementary material for: Comprehensive Analysis of the GRAS Gene Family in Paulownia fortunei and the Response of DELLA Proteins to Paulownia Witches’ Broom
Source: MDPI journal article supplement (doi:10.3390/ijms25042425), 2024-02-19
Supplement: s1 [file s1]

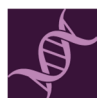

**Table S1.** Basic characteristics of proteins encoded by *pfGRASs*.

| Gene     | Accession number | Peptide length(aa) | pI   | MW(D)    | Atomic composition                                                                      | Instability Index | Aliphatic index | Subcellular location  |
|----------|------------------|--------------------|------|----------|-----------------------------------------------------------------------------------------|-------------------|-----------------|-----------------------|
| PfGRAS1  | Pfo02g003840.1   | 801                | 5.85 | 86249.06 | C <sub>3820</sub> H <sub>5952</sub> N <sub>1060</sub> O <sub>1174</sub> S <sub>23</sub> | 59.38             | 80.24           | Nucleus               |
| PfGRAS2  | Pfo03g010120.1   | 454                | 5.74 | 50216.4  | C <sub>2230</sub> H <sub>3501</sub> N <sub>611</sub> O <sub>663</sub> S <sub>23</sub>   | 43.87             | 93.18           | Chloroplast           |
| PfGRAS3  | Pfo03g013780.1   | 761                | 7.65 | 86379.74 | C <sub>3834</sub> H <sub>5974</sub> N <sub>1074</sub> O <sub>1150</sub> S <sub>27</sub> | 41.42             | 75.45           | Nucleus               |
| PfGRAS4  | Pfo04g009860.1   | 474                | 5.91 | 53072.15 | C <sub>2365</sub> H <sub>3749</sub> N <sub>639</sub> O <sub>696</sub> S <sub>25</sub>   | 59.8              | 95.9            | Nucleus               |
| PfGRAS5  | Pfo04g012510.1   | 789                | 5.65 | 85326.27 | C <sub>3787</sub> H <sub>5878</sub> N <sub>1038</sub> O <sub>1155</sub> S <sub>28</sub> | 55.6              | 80.7            | Nucleus               |
| PfGRAS6  | Pfo05g004830.1   | 477                | 6.05 | 53127.13 | C <sub>2354</sub> H <sub>3653</sub> N <sub>665</sub> O <sub>701</sub> S <sub>20</sub>   | 45.78             | 83.21           | Endoplasmic reticulum |
| PfGRAS7  | Pfo05g007100.1   | 471                | 5.95 | 53050.12 | C <sub>2363</sub> H <sub>3739</sub> N <sub>641</sub> O <sub>693</sub> S <sub>26</sub>   | 58.43             | 91.96           | Cytoplasm             |
| PfGRAS8  | Pfo05g008820.1   | 336                | 5.36 | 37553.59 | C <sub>1685</sub> H <sub>2674</sub> N <sub>444</sub> O <sub>487</sub> S <sub>19</sub>   | 49.21             | 108.3           | Chloroplast           |
| PfGRAS9  | Pfo05g010890.1   | 591                | 8.91 | 67380.34 | C <sub>2986</sub> H <sub>4676</sub> N <sub>842</sub> O <sub>896</sub> S <sub>21</sub>   | 44.25             | 70.92           | Nucleus               |
| PfGRAS10 | Pfo05g010900.1   | 719                | 6.55 | 81560.98 | C <sub>3569</sub> H <sub>5555</sub> N <sub>1025</sub> O <sub>1091</sub> S <sub>40</sub> | 56.63             | 66.84           | Nucleus               |
| PfGRAS11 | Pfo05g010910.1   | 756                | 5.07 | 85015.49 | C <sub>3770</sub> H <sub>5844</sub> N <sub>1018</sub> O <sub>1174</sub> S <sub>25</sub> | 52.08             | 77.22           | Nucleus               |
| PfGRAS12 | Pfo06g003490.1   | 582                | 4.92 | 63212.32 | C <sub>2768</sub> H <sub>4355</sub> N <sub>767</sub> O <sub>871</sub> S <sub>28</sub>   | 34.94             | 82.98           | Nucleus               |
| PfGRAS13 | Pfo06g007940.1   | 606                | 5.14 | 66552.01 | C <sub>2968</sub> H <sub>4607</sub> N <sub>793</sub> O <sub>913</sub> S <sub>17</sub>   | 54.69             | 80.23           | Nucleus               |
| PfGRAS14 | Pfo06g008150.1   | 554                | 5.79 | 61474.81 | C <sub>2758</sub> H <sub>4303</sub> N <sub>749</sub> O <sub>819</sub> S <sub>13</sub>   | 44.7              | 90.63           | Chloroplast           |
| PfGRAS15 | Pfo06g010090.1   | 505                | 5.63 | 57037.9  | C <sub>2505</sub> H <sub>3870</sub> N <sub>710</sub> O <sub>775</sub> S <sub>22</sub>   | 50.92             | 72.02           | Nucleus               |
| PfGRAS16 | Pfo06g010290.1   | 452                | 5.68 | 50464.72 | C <sub>2251</sub> H <sub>3517</sub> N <sub>613</sub> O <sub>662</sub> S <sub>22</sub>   | 42.98             | 89.98           | Chloroplast           |
| PfGRAS17 | Pfo06g012740.1   | 420                | 6.57 | 46705.47 | C <sub>2066</sub> H <sub>3272</sub> N <sub>586</sub> O <sub>609</sub> S <sub>20</sub>   | 36.52             | 89.64           | Chloroplast           |
| PfGRAS18 | Pfo07g006000.1   | 586                | 5.12 | 64178.3  | C <sub>2833</sub> H <sub>4402</sub> N <sub>778</sub> O <sub>876</sub> S <sub>25</sub>   | 48.95             | 79.71           | Nucleus               |
| PfGRAS19 | Pfo07g009710.1   | 736                | 5.57 | 80472.42 | C <sub>3593</sub> H <sub>5567</sub> N <sub>967</sub> O <sub>1073</sub> S <sub>31</sub>  | 44.68             | 87.18           | Cytoplasm             |
| PfGRAS20 | Pfo07g011240.1   | 674                | 6.13 | 75003.88 | C <sub>3294</sub> H <sub>5201</sub> N <sub>945</sub> O <sub>1006</sub> S <sub>27</sub>  | 61.6              | 80.42           | Nucleus               |
| PfGRAS21 | Pfo08g007560.1   | 424                | 5.54 | 46786.48 | C <sub>2081</sub> H <sub>3283</sub> N <sub>569</sub> O <sub>621</sub> S <sub>18</sub>   | 50.25             | 97.73           | Cytoplasm             |
| PfGRAS22 | Pfo08g014150.1   | 554                | 6.38 | 61385.63 | C <sub>2691</sub> H <sub>4195</sub> N <sub>777</sub> O <sub>838</sub> S <sub>17</sub>   | 43.88             | 72.37           | Nucleus               |
| PfGRAS23 | Pfo09g008150.1   | 553                | 5.51 | 61286.71 | C <sub>2689</sub> H <sub>4178</sub> N <sub>750</sub> O <sub>844</sub> S <sub>24</sub>   | 50.89             | 76.5            | Nucleus               |
| PfGRAS24 | Pfo09g009840.1   | 426                | 6.44 | 47956.5  | C <sub>2148</sub> H <sub>3350</sub> N <sub>612</sub> O <sub>620</sub> S <sub>9</sub>    | 57.33             | 96              | Cytoplasm             |
| PfGRAS25 | Pfo09g012760.1   | 584                | 6.04 | 65429.43 | C <sub>2876</sub> H <sub>4476</sub> N <sub>824</sub> O <sub>885</sub> S <sub>21</sub>   | 56.98             | 76.5            | Nucleus               |
| PfGRAS26 | Pfo09g019200.1   | 343                | 6.45 | 37467.84 | C <sub>1656</sub> H <sub>2647</sub> N <sub>467</sub> O <sub>497</sub> S <sub>13</sub>   | 46.2              | 99.04           | Chloroplast           |
| PfGRAS27 | Pfo09g020030.1   | 547                | 5.51 | 61065.1  | C <sub>2687</sub> H <sub>4184</sub> N <sub>740</sub> O <sub>826</sub> S <sub>31</sub>   | 49.92             | 81.3            | Chloroplast           |
| PfGRAS28 | Pfo10g000470.1   | 728                | 5.59 | 80700.04 | C <sub>3548</sub> H <sub>5559</sub> N <sub>995</sub> O <sub>1097</sub> S <sub>31</sub>  | 54.44             | 80.91           | Nucleus               |
| PfGRAS29 | Pfo10g003570.1   | 568                | 6.25 | 61865.8  | C <sub>2700</sub> H <sub>4308</sub> N <sub>768</sub> O <sub>854</sub> S <sub>21</sub>   | 57.74             | 79.47           | Chloroplast           |
| PfGRAS30 | Pfo10g009350.1   | 746                | 5.94 | 84404.66 | C <sub>3733</sub> H <sub>5823</sub> N <sub>1027</sub> O <sub>1135</sub> S <sub>36</sub> | 47.23             | 74.46           | Nucleus               |
| PfGRAS31 | Pfo10g009370.1   | 746                | 5.94 | 84404.66 | C <sub>3733</sub> H <sub>5823</sub> N <sub>1027</sub> O <sub>1135</sub> S <sub>36</sub> | 47.23             | 74.46           | Nucleus               |
| PfGRAS32 | Pfo11g000660.1   | 324                | 5.12 | 35874.89 | C <sub>1578</sub> H <sub>2514</sub> N <sub>416</sub> O <sub>499</sub> S <sub>18</sub>   | 52.68             | 82.41           | Nucleus               |
| PfGRAS33 | Pfo11g000670.1   | 658                | 8.22 | 74888.78 | C <sub>3340</sub> H <sub>5286</sub> N <sub>914</sub> O <sub>956</sub> S <sub>42</sub>   | 47.24             | 91.13           | Cytoplasm             |
| PfGRAS34 | Pfo11g000680.1   | 447                | 7.85 | 50853.79 | C <sub>2254</sub> H <sub>3601</sub> N <sub>615</sub> O <sub>665</sub> S <sub>28</sub>   | 36.11             | 92.04           | Nucleus               |
| PfGRAS35 | Pfo11g000690.1   | 487                | 6.01 | 55157.38 | C <sub>2472</sub> H <sub>3878</sub> N <sub>656</sub> O <sub>725</sub> S <sub>24</sub>   | 38.43             | 90.51           | Nucleus               |
| PfGRAS36 | Pfo11g006510.1   | 453                | 5.34 | 50925.71 | C <sub>2229</sub> H <sub>3520</sub> N <sub>620</sub> O <sub>695</sub> S <sub>25</sub>   | 50.36             | 79.38           | Nucleus               |
| PfGRAS37 | Pfo11g013890.1   | 567                | 5.05 | 63406.97 | C <sub>2763</sub> H <sub>4320</sub> N <sub>774</sub> O <sub>885</sub> S <sub>27</sub>   | 52.04             | 78.59           | Nucleus               |
| PfGRAS38 | Pfo11g015060.1   | 462                | 6.16 | 52755.26 | C <sub>2359</sub> H <sub>3677</sub> N <sub>629</sub> O <sub>706</sub> S <sub>22</sub>   | 42.01             | 82.28           | Nucleus               |

|          |                |     |      |          |                         |       |       |                       |
|----------|----------------|-----|------|----------|-------------------------|-------|-------|-----------------------|
| PfGRAS39 | Pfo12g000210.1 | 579 | 5.3  | 65041.27 | C2883H4525N781O868S32   | 43.33 | 86.07 | Cytoplasm             |
| PfGRAS40 | Pfo12g004460.1 | 470 | 5.65 | 52950.02 | C2354H3731N633O697S28   | 53.26 | 93.2  | Endoplasmic reticulum |
| PfGRAS41 | Pfo13g002280.1 | 407 | 5.57 | 44455.69 | C1976H3095N545O587S18   | 33.49 | 90.64 | Cytoplasm             |
| PfGRAS42 | Pfo13g005740.1 | 602 | 5.21 | 66028.23 | C2943H4542N784O909S18   | 49.8  | 77.62 | Nucleus               |
| PfGRAS43 | Pfo13g005930.1 | 552 | 5.64 | 61135.22 | C2736H4238N746O815S16   | 49.9  | 85.34 | Chloroplast           |
| PfGRAS44 | Pfo13g007670.1 | 505 | 5.63 | 56864.79 | C2498H3843N701O771S26   | 51.55 | 68.55 | Nucleus               |
| PfGRAS45 | Pfo13g012150.1 | 539 | 6.64 | 60368.51 | C2671H4192N748O805S22   | 58.25 | 83.81 | Nucleus               |
| PfGRAS46 | Pfo14g005090.1 | 510 | 6.13 | 56216.55 | C2505H3956N684O737S24   | 52.67 | 95.99 | Cytoplasm             |
| PfGRAS47 | Pfo14g007210.1 | 176 | 4.81 | 19777.53 | C879H1373N235O266S9     | 39.15 | 92.51 | Nucleus               |
| PfGRAS48 | Pfo15g001820.1 | 461 | 7.58 | 52682.36 | C2349H3690N636O694S23   | 38.52 | 81.59 | Nucleus               |
| PfGRAS49 | Pfo15g002590.1 | 487 | 5.62 | 54178.94 | C2378H3690N678O729S23   | 38.2  | 80.33 | Nucleus               |
| PfGRAS50 | Pfo15g003740.1 | 576 | 5.16 | 64517.12 | C2816H4399N785O904S25   | 49.37 | 77.53 | Nucleus               |
| PfGRAS51 | Pfo16g000130.1 | 411 | 5.58 | 46240.19 | C2072H3237N557O399S22   | 43.1  | 94.02 | Cytoskeleton          |
| PfGRAS52 | Pfo16g000660.1 | 537 | 6.39 | 59135.51 | C2648H4152N726O777S17   | 61.94 | 90.5  | Chloroplast           |
| PfGRAS53 | Pfo16g006870.1 | 583 | 5.59 | 65180.26 | C2876H4457N803O885S23   | 54.24 | 78.81 | Chloroplast           |
| PfGRAS54 | Pfo16g008010.1 | 539 | 4.64 | 59853.69 | C2634H4122N716O821S28   | 45.29 | 90.99 | Cytoplasm             |
| PfGRAS55 | Pfo16g008480.1 | 427 | 6.31 | 47895.51 | C2146H3351N607O620S10   | 62.78 | 96.95 | Cytoplasm             |
| PfGRAS56 | Pfo16g009370.1 | 538 | 5.39 | 59352.32 | C2601H4103N719O809S30   | 51.62 | 89.74 | Nucleus               |
| PfGRAS57 | Pfo16g010020.1 | 552 | 5.94 | 61825.67 | C2701H4212N770O835S31   | 54.65 | 78.04 | Nucleus               |
| PfGRAS58 | Pfo17g000310.1 | 563 | 5.24 | 61714.8  | C2721H4259N745O842S26   | 49.33 | 82.9  | Nucleus               |
| PfGRAS59 | Pfo19g001000.1 | 587 | 5.11 | 65750.68 | C2907H4524N770O896S36   | 44.29 | 78.4  | Nucleus               |
| PfGRAS60 | Pfo19g001010.1 | 565 | 5.11 | 63770.46 | C2844H4466N752O871S20   | 48.8  | 89.2  | Nucleus               |
| PfGRAS61 | Pfo19g001020.1 | 556 | 5.65 | 63332.24 | C2814H4440N762O851S24   | 52.99 | 87.51 | Nucleus               |
| PfGRAS62 | Pfo19g001030.1 | 579 | 6.31 | 64383.77 | C2853H4558N778O864S25   | 44.07 | 95.19 | Cytoplasm             |
| PfGRAS63 | Pfo19g001040.1 | 451 | 5.53 | 50852.25 | C2236H3554N612O682S29   | 42.18 | 89.71 | Nucleus               |
| PfGRAS64 | Pfo19g008150.1 | 403 | 5.42 | 45037.2  | C1984H3170N548O616S15   | 41.6  | 92.86 | Cytoplasm             |
| PfGRAS65 | Pfo20g004210.1 | 747 | 6.39 | 84028.06 | C3715H5799N1039O1126S31 | 44.54 | 75.29 | Nucleus               |
| PfGRAS66 | Pfo20g008370.1 | 625 | 6.78 | 67856.72 | C2950H4728N846O934S27   | 55.48 | 79.04 | Chloroplast           |
| PfGRAS67 | Pfoxxg000700.1 | 680 | 5.83 | 73398.44 | C3226H5084N904O1016S19  | 52.62 | 82.68 | Chloroplast           |
| PfGRAS68 | Pfoxxg009460.1 | 209 | 5.55 | 23455.2  | C1046H1595N287O319S5    | 65.25 | 66.25 | Nucleus               |
| PfGRAS69 | Pfoxxg009470.1 | 765 | 6.32 | 87157.81 | C3865H6013N1075O1158S34 | 45.9  | 76.61 | Nucleus               |
| PfGRAS70 | Pfoxxg010850.1 | 386 | 5.08 | 44663.19 | C2000H2983N529O395S22   | 43.95 | 69.38 | Nucleus               |
| PfGRAS71 | Pfoxxg010860.1 | 522 | 4.73 | 58963.64 | C2585H4031N693O816S34   | 55.8  | 77.5  | Nucleus               |
| PfGRAS72 | Pfoxxg011760.1 | 425 | 5.78 | 46540.32 | C2050H3240N580O640S9    | 52.05 | 86.6  | Nucleus               |
| PfGRAS73 | Pfoxxg012780.1 | 792 | 6.06 | 85114.36 | C3721H5861N1059O1180S25 | 50.81 | 78.62 | Nucleus               |
| PfGRAS74 | Pfoxxg014180.1 | 755 | 6.41 | 86196.66 | C3828H5957N1065O1146S30 | 45.36 | 77.49 | Nucleus               |
| PfGRAS75 | Pfoxxg014190.1 | 465 | 9.18 | 52896.73 | C2380H3724N660O675S16   | 45.95 | 82.22 | Cytoplasm             |
| PfGRAS76 | Pfoxxg020540.1 | 512 | 4.74 | 57715.28 | C2527H3950N680O798S34   | 56.33 | 78.45 | Nucleus               |
| PfGRAS77 | Pfoxxg021460.1 | 527 | 8.07 | 56156.67 | C2417H3854N710O791S20   | 52.93 | 71.33 | Nucleus               |
| PfGRAS78 | Pfoxxg024740.1 | 792 | 6.06 | 85114.36 | C3721H5861N1059O1180S25 | 50.81 | 78.62 | Nucleus               |
| PfGRAS79 | Pfoxxg025380.1 | 530 | 4.87 | 61051.65 | C2733H4093N713O822S30   | 47.66 | 71.47 | Peroxisome            |

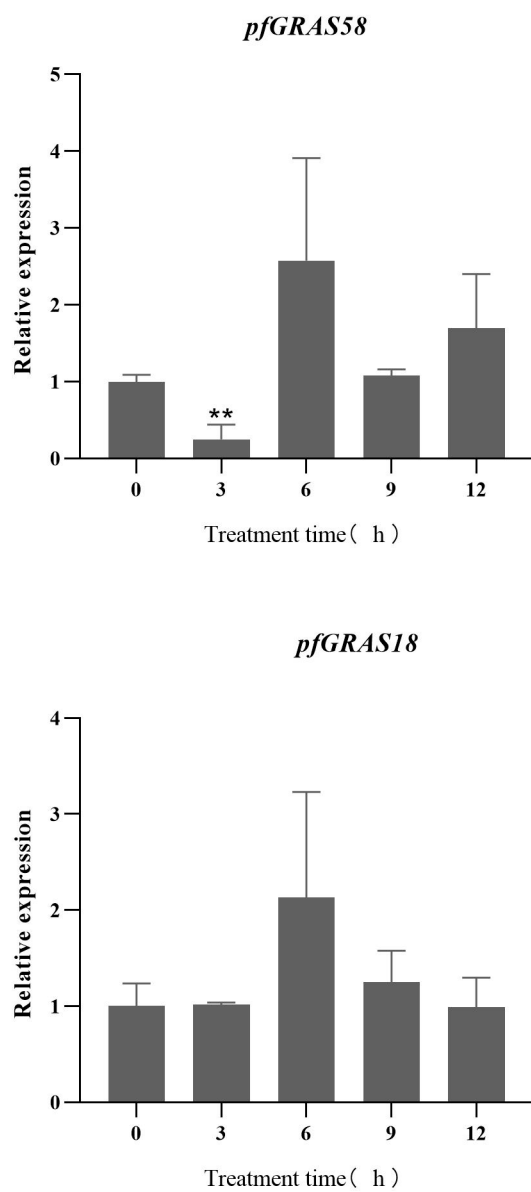

**Figure S1.** Expression patterns of *PfGRAS18/58* under GA3 treatment.

**Table S2.** Primer sequence information.

| Gene             | Forward primer (5'-3')                    | Reverse primer (5'-3')                    |
|------------------|-------------------------------------------|-------------------------------------------|
| PfGRAS9          | TGGAGCAACCACACTTCACA                      | GAATCCCGGTTGGGGGAAAT                      |
| PfGRAS12         | TTCGAGTTCCGTGGCTTTGT                      | CAGCACTTTGTGCATGGCAC                      |
| PfGRAS15         | GGACTATGTTCCGGGCACGTT                     | CAAAATGCGGGGTTTCATCGG                     |
| PfGRAS18         | AGTGAGGTTTACTTGGGGCG                      | TATACCCATCCCCACCAGCA                      |
| PfGRAS19         | AGCCTCCTGCGGATCTTTTT                      | TGCTGCTGGATACTCACACC                      |
| PfGRAS23         | AGACAGGTTGCAGTATCGGC                      | GGATAACAACCTCGCCCTGA                      |
| PfGRAS41         | AGCTTCACCGCTGTTATCC                       | TTCGCCTCCTGCTCAACAAT                      |
| PfGRAS58         | TGGTTGACTCGCAGGAGAAC                      | TCTCATAGCTCCTGCTTGCG                      |
| PfActin          | AATGGAATCTGCTGGAAT                        | ACTGAGGACAATGTTACC                        |
| PfGRAS12-PSAK277 | GTGGATCCAAAGAATTCATGAAAAGAGATCGTGATCG     | CTCCTTTACCCATGAATTCTTCCCCTGCCGTGAGCCGCC   |
| PfGRAS12-ECN     | AGTGGTCTCTGTCCAGTCCTATGAAAAGAGATCGTGATCG  | GGTCTCAGCAGACCACAAGTTTCCCCTGCCGTGAGCCGCC  |
| PfIAZ3-ENN       | AGTGGTCTCTGTCCAGTCCTTGGAGAGAGATTTCATGGG   | GGTCTCAGCAGACCACAAGTATTGATTGCTGGAACAGGAC  |
| PfGRAS12-BD      | GAGGAGGACCTGCATATGATGAAAAGAGATCGTGATCG    | ACGGATCCCCGGGAATTCTTCCCCTGCCGTGAGCCGCC    |
| PfIAZ3-AD        | GCCATGGAGGCCAGTGAATTCATGGAGAGAGATTTCATGGG | CAGCTCGAGCTCGATGGATCCATTGATTGCTGGAACAGGAC |
